# Supplementary material for: A comprehensive insight into functional profiles of free-living microbial community responses to a toxic Akashiwo sanguinea bloom
Source: PubMed Central journal article supplement (PMC5050414; doi:10.1038/srep34645), 2016-10-05
Supplement: srep34645-s1.pdf [file srep34645-s1.pdf]

**A comprehensive insights into Functional profiles of free-living microbial community responses to a toxic *Akashiwo sanguinea* bloom**

Caiyun Yang<sup>1,2†</sup>, Yi Li<sup>2,3†</sup>, Yanyan Zhou<sup>2</sup>, Xueqian Lei<sup>2</sup>, Wei Zheng<sup>2</sup>, Yun Tian<sup>2</sup>, Joy D. Van Nostrand<sup>4</sup>, Liyou Wu<sup>4</sup>, Zhili He<sup>4</sup>, Jizhong Zhou<sup>4,5,6\*</sup>, Tianling Zheng<sup>2\*</sup>

**Table S1** (Yang *et al.*, 2015) Properties of samples during the *Akashiwo sanguinea* bloom in 2011 (Only the samples for comparison (bloom vs. control) are shown)

| Samples | T    | Sal | pH   | SP   | DO   | NO <sub>2</sub> <sup>-</sup> | NO <sub>3</sub> <sup>-</sup> | NH <sub>4</sub> <sup>+</sup> | DIN    | DIP   | N/P   | SiO <sub>4</sub> <sup>-</sup> | COD  | CHLa  | EI   | BACT                  | <i>A. sa</i>         | TALG                 |
|---------|------|-----|------|------|------|------------------------------|------------------------------|------------------------------|--------|-------|-------|-------------------------------|------|-------|------|-----------------------|----------------------|----------------------|
| A1-1    | 31   | 24  | 7.99 | 2.8  | 5.25 | 0.032                        | 0.186                        | 0.009                        | 0.227  | 0.021 | 11    | 0.87                          | 4.66 | 67.91 | 4.84 | 4.60×10 <sup>11</sup> | 1.08×10 <sup>5</sup> | 1.32×10 <sup>5</sup> |
| A1-2    | 31   | 26  | 7.97 | 19.0 | 4.66 | 0.029                        | 0.194                        | 0.009                        | 0.232  | 0.032 | 7.33  | 0.84                          | 2.04 | 51.9  | 3.32 | 4.11×10 <sup>11</sup> | 2.05×10 <sup>5</sup> | 2.36×10 <sup>5</sup> |
| A1-3    | 30.8 | 28  | 7.89 | 15.5 | 4.57 | 0.030                        | 0.355                        | --                           | --     | 0.026 | --    | 0.95                          | 2.95 | 23.32 | --   | 9.96×10 <sup>11</sup> | 1.55×10 <sup>5</sup> | 1.84×10 <sup>5</sup> |
| A1-4    | 30   | 29  | 7.87 | 14.2 | 4.46 | 0.030                        | 0.296                        | 0.028                        | 0.354  | 0.020 | 18.03 | 0.90                          | 2.01 | 33.09 | 3.09 | 3.11×10 <sup>11</sup> | 0.81×10 <sup>5</sup> | 0.99×10 <sup>5</sup> |
| A1-5    | 30.5 | 25  | 7.84 | 13.8 | 3.9  | 0.013                        | 0.117                        | 0.018                        | 0.147  | 0.010 | 15.38 | 0.57                          | 1.89 | 52.97 | 0.59 | 2.86×10 <sup>11</sup> | 1.70×10 <sup>5</sup> | 1.89×10 <sup>5</sup> |
| A1-8    | 31   | 30  | 7.82 | 10.1 | 3.51 | 0.026                        | 0.255                        | 0.078                        | 0.359  | 0.027 | 13.20 | 1.02                          | 1.38 | 21.3  | 3.00 | --                    | 0.10×10 <sup>5</sup> | 0.37×10 <sup>5</sup> |
| H1-1    | 31   | 24  | 7.89 | 13.6 | 6.17 | 0.043                        | 0.183                        | 0.002                        | 0.228  | 0.012 | 18.96 | 0.79                          | 1.45 | 38.65 | 0.88 | 1.77×10 <sup>11</sup> | 0.18×10 <sup>5</sup> | 0.41×10 <sup>5</sup> |
| H1-2    | 31   | 24  | 7.87 | 10.6 | --   | 0.027                        | 0.213                        | 0.026                        | 0.266  | 0.013 | 20.87 | 0.56                          | 0.97 | 28.13 | 0.74 | 1.00×10 <sup>11</sup> | 0.08×10 <sup>5</sup> | 0.18×10 <sup>5</sup> |
| H1-3    | 31   | 25  | 7.84 | 10.4 | 3.65 | 0.023                        | 0.186                        | 0.031                        | 0.2393 | 0.024 | 10.06 | 0.68                          | 1.26 | 31.31 | 1.59 | 0.75×10 <sup>11</sup> | 0.22×10 <sup>5</sup> | 0.35×10 <sup>5</sup> |
| H1-4    | 30.5 | 29  | 7.78 | 14.6 | 3.76 | 0.015                        | 0.194                        | 0.030                        | 0.2385 | 0.012 | 20.24 | 0.79                          | 1.36 | 21.58 | 0.85 | 1.23×10 <sup>11</sup> | 0.63×10 <sup>5</sup> | 0.76×10 <sup>5</sup> |
| H1-5    | 30.5 | 29  | 7.75 | 15.0 | 3.73 | 0.023                        | 0.230                        | 0.040                        | 0.2927 | 0.009 | 34.02 | 0.94                          | 1.04 | 23.14 | 0.58 | 2.38×10 <sup>11</sup> | 0.08×10 <sup>5</sup> | 0.14×10 <sup>5</sup> |
| H1-8    | 31.8 | 26  | 7.61 | 13.0 | 6.13 | 0.039                        | 0.375                        | 0.122                        | 0.535  | 0.050 | 10.61 | 1.51                          | 1.14 | 20.81 | 6.87 | --                    | 0.33×10 <sup>5</sup> | 0.36×10 <sup>5</sup> |

The sample numbers indicate time (days), 1: 31 July; 2-5: 1-4 August; 8: 7 August. T: temperature, °C; Sal: salinity,‰; SP: suspended particles, mg/L; DO: dissolved

oxygen, mg/L; NO<sub>2</sub><sup>-</sup>: nitrite nitrogen, mg/L; NO<sub>3</sub><sup>-</sup>: nitrate nitrogen, mg/L; NH<sub>4</sub><sup>+</sup>: ammonia nitrogen, mg/L; DIN: dissolved inorganic nitrogen, mg/L; DIP: dissolved

inorganic phosphorus, mg/L; N/P: ratio of dissolved inorganic nitrogen and DIP; SiO<sub>4</sub><sup>-</sup>: silicate mg/L; COD: chemical oxygen demand, mg/L; CHLa: chlorophyll *a*, ug/L; EI:

Eutrophication index; BACT: bacterial density, cells/mL; *A. sa*: *Akashiwo sanguinea* density; TALG: total algal density; --: not available.

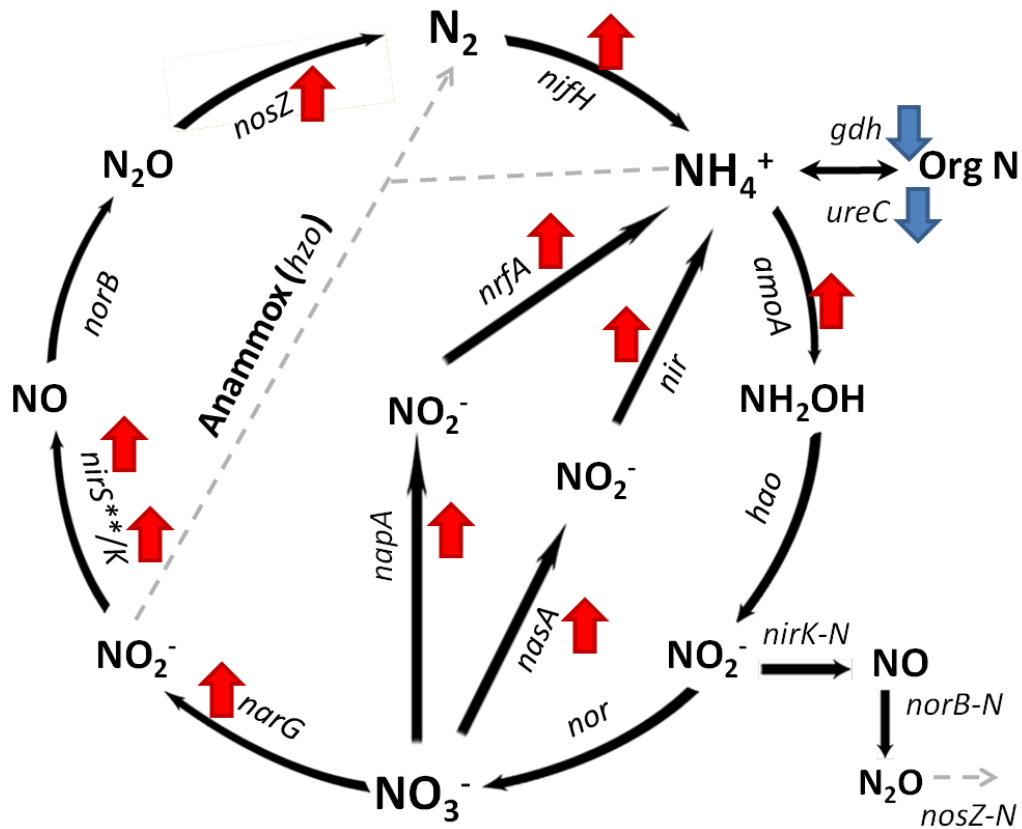

**Figure S1** A simplified N cycle diagram with gene signal intensity changes ( $P < 0.05$ ) in the bloom compared to the control site. The red arrows indicates a signal intensity increase while blue arrows indicate a signal intensity decrease.
